# Supplementary material for: Functional reservoir microcapsules generated via microfluidic fabrication for long-term cardiovascular therapeutics
Source: Royal Society of Chemistry journal article supplement (doi:10.1039/d0lc00296h), 2020-01-01
Supplement: d0lc00296h1.pdf [file d0lc00296h1.pdf]

## Electronic Supplementary Information (ESI)

### The experiments of phase separation curvature:

A mixture solution PEGDA (% v/v) and Dextran (% w/v) was prepared. The phase separation was observed by measuring the turbidity [1]. By changing the ratio of PEGDA (% v/v) and Dextran (% w/v) as tables below, the phase separation points and without phase separation points were recorded. The phase separation curvature was built based on the points.

Turbidity is the cloudiness or haziness of a fluid caused by large numbers of individual particles. By using UV-vis spectroscopy, the absorbance of the mixtures (A) was characterized. The turbidity was calculated following the equation below:

$$\text{Turbidity} = -\ln(10^{-A})$$

Reference:

[1] A. Y. Kwok, E. L. Prime, G. G. Qiao and D. H. Solomon, Polymer, 2003, 44, 7335-7344.

**Table S1. Table of building the phase separation curvature (%PEGDA/%dextran):**

| Red points | Green points |
|------------|--------------|
| 28/15      | 26/15        |
| 28/10      | 26/10        |
| 30/7.5     | 28/7.5       |
| 32/5       | 29/5         |
| 35/3       | 32/3         |
| 40/1       | 40/0         |

**Table S2. Table of building the phase separation of the immiscible and miscible regions (%PEGDA/%dextran):**

|      |      |       |       |
|------|------|-------|-------|
| 20/1 | 20/5 | 20/10 | 20/15 |
| 30/1 | 30/5 | 30/10 | 30/15 |
| 40/1 | 40/5 | 40/10 | 40/15 |
| 50/1 | 50/5 | 50/10 | 50/15 |

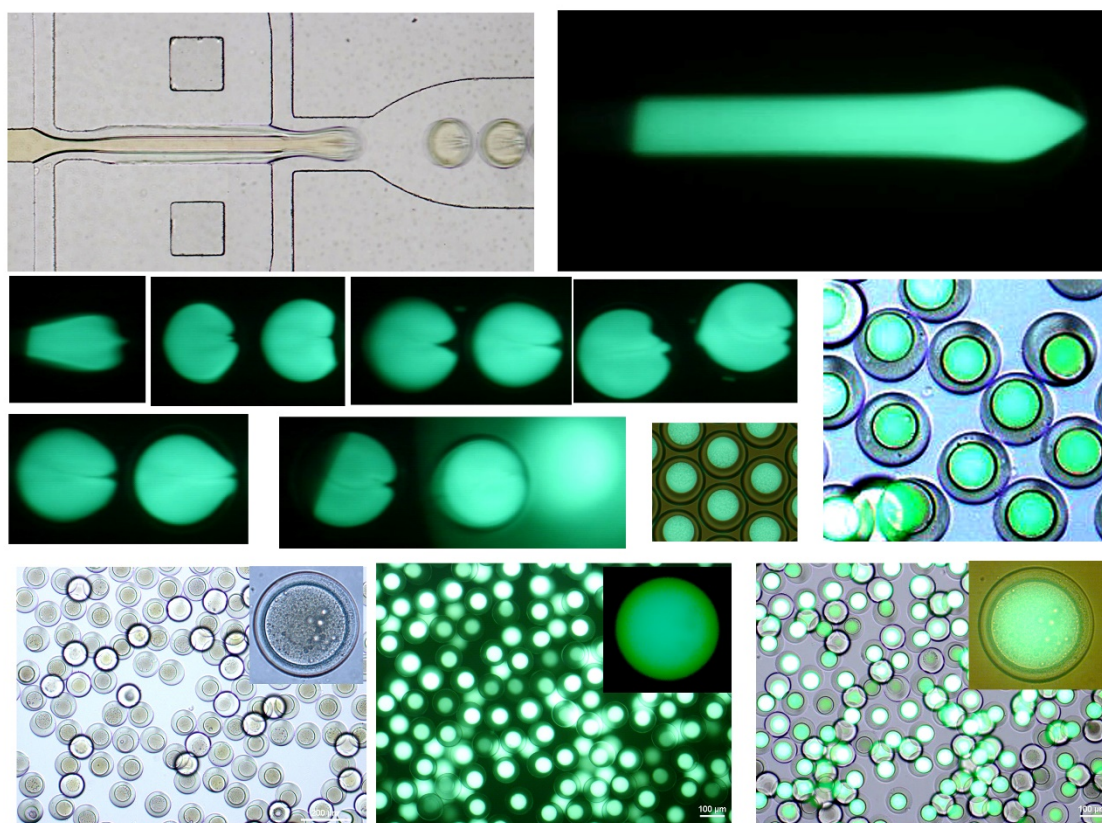

**Fig. S1. Core-shell microcapsule droplet formation:** The microfluidic system used for the synthesis of hydrogel microcapsules. Time-lapse images of the core (dextran-labeled fluorescence) during droplet formulation.

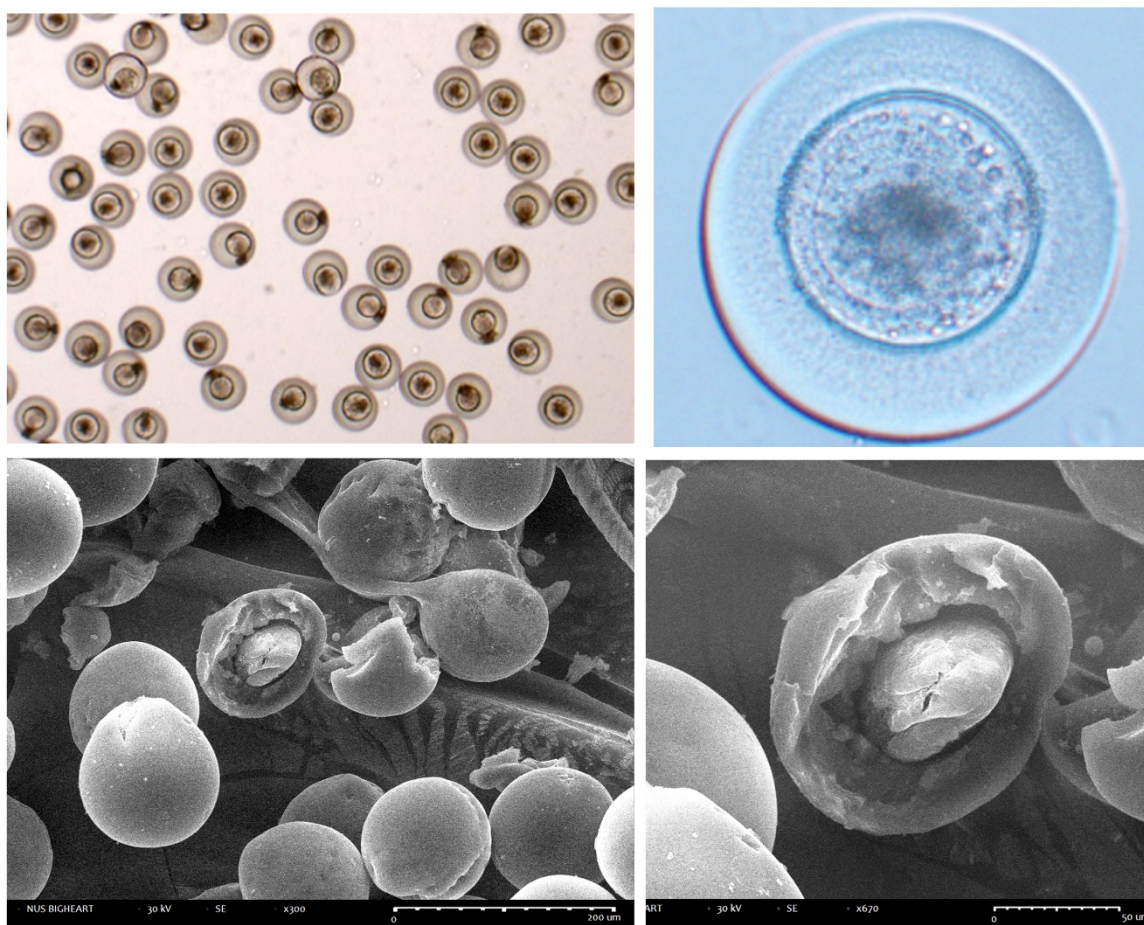

**Fig. S2. Microcapsules developed through the optimal microcapsule fabrication process:** Bright field and SEM images of microcapsules were recorded to indicate the morphologies of the reservoir microcapsules.

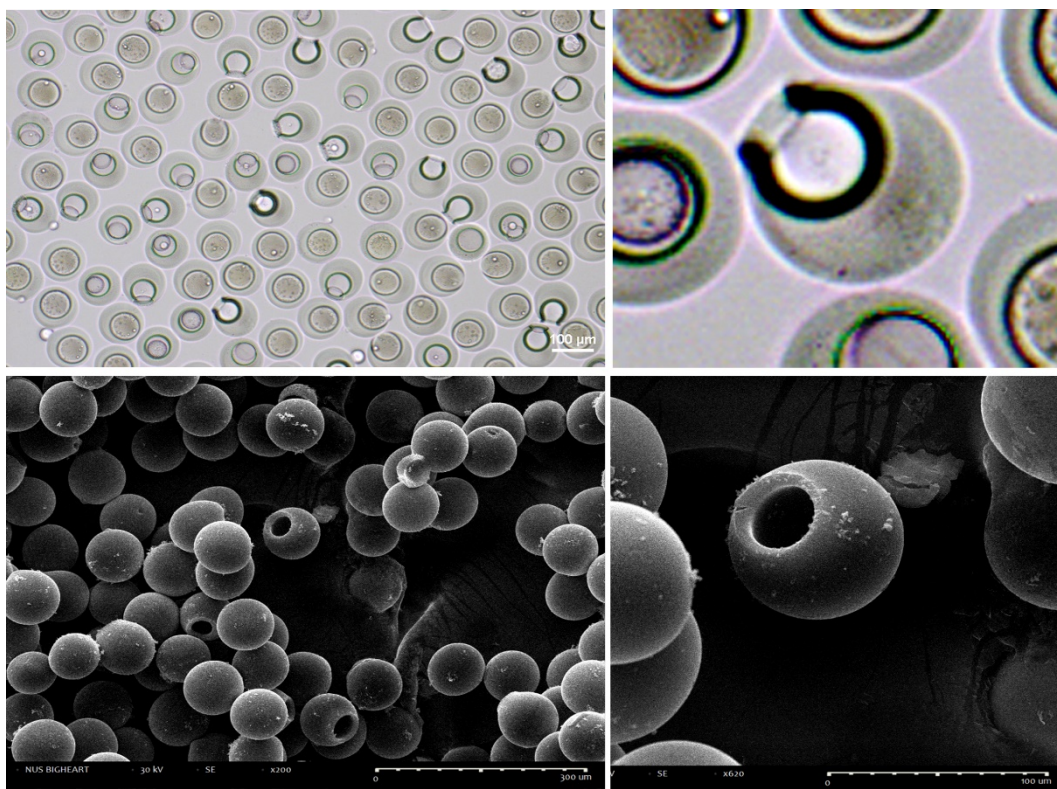

**Fig. S3. Non-optimized microcapsule fabrication:** Bright field and SEM images of microcapsules were recorded to indicate the internal structures of the reservoir microcapsules.



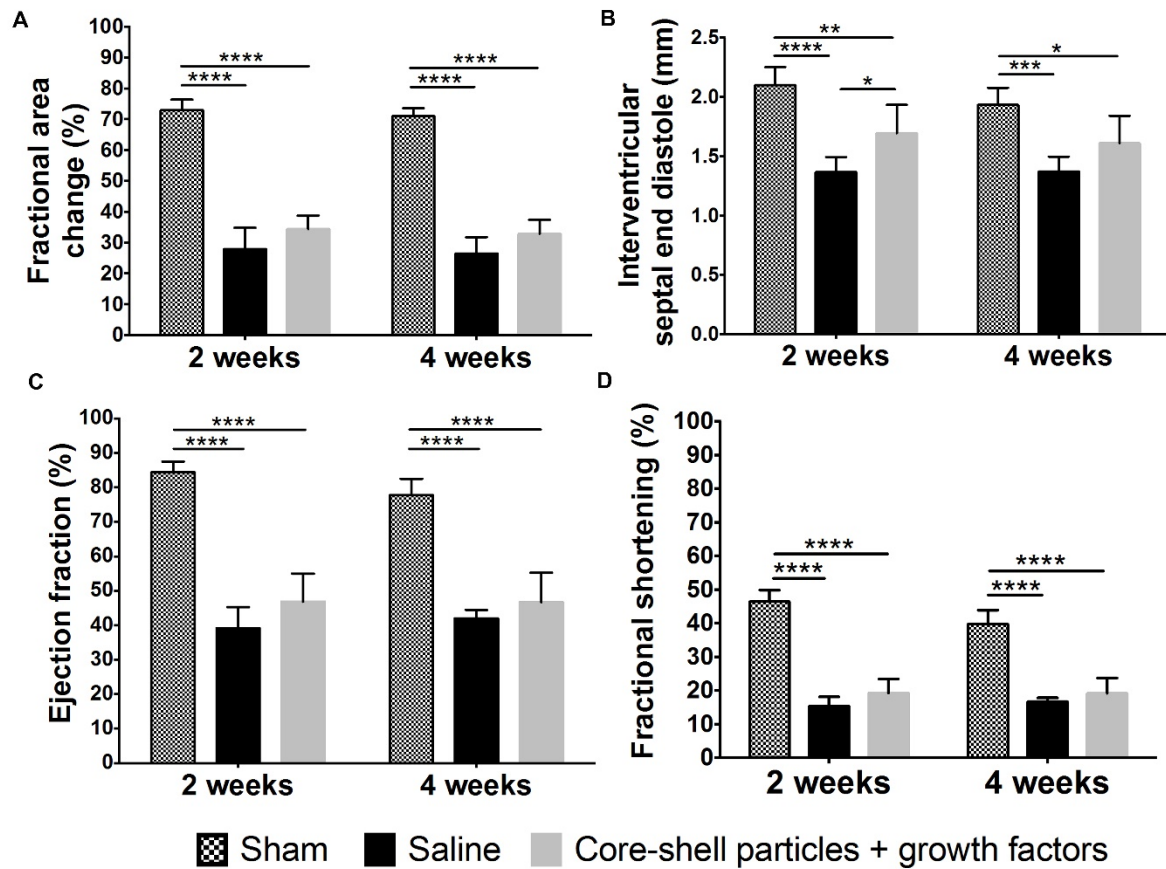

**Fig. S4. Echocardiography for cardiac function:** Echocardiography for cardiac function. (A) fractional area change (%), (B) interventricular septal end diastole (mm), (C) ejection fraction (%), (D) fractional shortening.

**Video S1. Microfluidic reservoir microcapsule fabrication.**

**Video S2. The phenomenon of the fluorescent core during droplet formulation.**
